# Supplementary material
Source: publisher figshare collection journal article supplement (https://karger.figshare.com/articles/dataset/_/21602364)
Supplement: Supplementary file 1 [file 1]

**Supplemental Figure 2.** Effect of sodium restriction on urine sodium and urine calcium

**
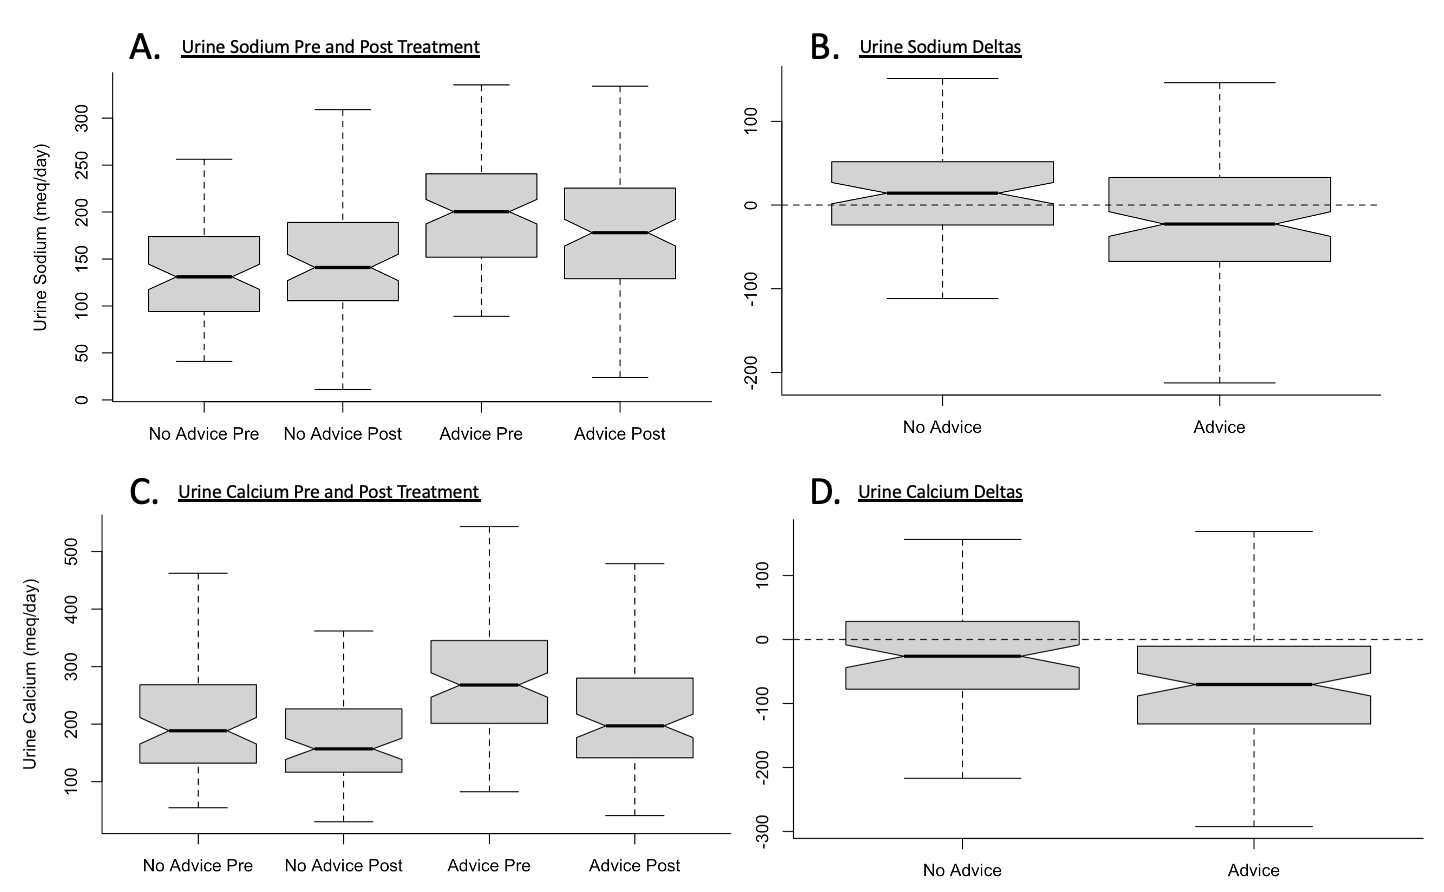
**

**Panel A**: P value comparing No Advice Pre to Advice Pre <0.001, p value comparing Advice Pre to Advice Post <0.01. **Panel B**: p value comparing Advice to No Advice <0.001. **Panel C**: P value comparing No Advice Pre to Advice Pre <0.001, p value comparing Advice Pre to Advice Post <0.001. **Panel D**: p value comparing Advice to No Advice <0.001.
